# Supplementary material
Source: PubMed Central journal article supplement (PMC2681277)
Supplement: jc.2008-1283_1.pdf [file jc.2008-1283_1.pdf]

**Supplemental Table 1**

| Gene number according to fig 1 | Gene    | rs number  | E2 p-value | E1 p-value | T p-value |
|--------------------------------|---------|------------|------------|------------|-----------|
| 1                              | AKR1C3  | rs11252935 | 0.94       | 0.72       | 0.42      |
| 1                              | AKR1C3  | rs12387    | 0.78       | 0.59       | 0.61      |
| 1                              | AKR1C3  | rs12529    | 0.86       | 0.42       | 0.09      |
| 1                              | AKR1C3  | rs17396032 | 0.49       | 0.31       | 0.23      |
| 1                              | AKR1C3  | rs1937841  | 0.45       | 0.69       | 0.22      |
| 1                              | AKR1C3  | rs2154306  | 0.93       | 0.45       | 0.60      |
| 1                              | AKR1C3  | rs2275928  | 0.89       | 0.78       | 0.74      |
| 1                              | AKR1C3  | rs2298305  | 0.48       | 0.61       | 0.25      |
| 1                              | AKR1C3  | rs3750566  | 0.99       | 0.98       | 0.15      |
| 1                              | AKR1C3  | rs4242785  | 0.87       | 0.71       | 0.35      |
| 1                              | AKR1C3  | rs4559587  | 0.78       | 0.56       | 0.50      |
| 1                              | AKR1C3  | rs4881400  | 0.94       | 0.94       | 0.40      |
| 1                              | AKR1C3  | rs7086771  | 0.92       | 0.79       | 0.42      |
| 1                              | AKR1C3  | rs7894034  | 0.69       | 0.63       | 0.50      |
| 2                              | AR      | rs12011518 | 0.83       | 0.93       | 0.39      |
| 2                              | AR      | rs1204039  | 0.47       | 0.75       | 0.36      |
| 2                              | AR      | rs12396249 | 0.34       | 0.93       | 0.43      |
| 2                              | AR      | rs2361634  | 0.32       | 0.45       | 0.12      |
| 2                              | AR      | rs5031002  | 0.93       | 0.66       | 0.97      |
| 2                              | AR      | rs5918764  | 0.10       | 0.99       | 0.95      |
| 2                              | AR      | rs7064188  | 0.66       | 0.66       | 0.34      |
| 3                              | CGA     | rs6631     | 0.95       | 0.40       | 0.43      |
| 3                              | CGA     | rs6909630  | 0.93       | 0.21       | 0.46      |
| 3                              | CGA     | rs6909901  | 0.35       | 0.86       | 0.40      |
| 3                              | CGA     | rs7745823  | 0.81       | 0.43       | 0.30      |
| 3                              | CGA     | rs932742   | 0.88       | 0.12       | 0.52      |
| 3                              | CGA     | rs9444470  | 0.85       | 0.92       | 0.18      |
| 3                              | CGA     | rs981086   | 0.98       | 0.45       | 0.18      |
| 4                              | COMT    | rs1544325  | 0.99       | 0.69       | 0.67      |
| 4                              | COMT    | rs165815   | 0.14       | 0.50       | 0.83      |
| 4                              | COMT    | rs165849   | 0.09       | 0.66       | 0.46      |
| 4                              | COMT    | rs174675   | 0.54       | 0.77       | 0.49      |
| 4                              | COMT    | rs174696   | 0.15       | 0.18       | 0.10      |
| 4                              | COMT    | rs2020917  | 0.54       | 0.98       | 0.25      |
| 4                              | COMT    | rs2239393  | 0.09       | 0.38       | 0.04      |
| 4                              | COMT    | rs2240714  | 0.63       | 0.76       | 0.35      |
| 4                              | COMT    | rs4485648  | 0.44       | 0.84       | 0.37      |
| 4                              | COMT    | rs4680     | 0.01       | 0.27       | 0.008     |
| 4                              | COMT    | rs9332377  | 0.43       | 0.68       | 0.36      |
| 4                              | COMT    | rs9605030  | 0.97       | 0.71       | 0.28      |
| 5                              | CYP17A1 | rs10883783 | 0.53       | 0.07       | 0.75      |
| 5                              | CYP17A1 | rs17115100 | 0.47       | 0.01       | 0.16      |
| 5                              | CYP17A1 | rs17724534 | 0.04996    | 0.64       | 0.23      |
| 5                              | CYP17A1 | rs2486758  | 0.44       | 0.21       | 0.04      |
| 5                              | CYP17A1 | rs3824755  | 0.41       | 0.01       | 0.14      |
| 5                              | CYP17A1 | rs6162     | 0.99       | 0.90       | 0.39      |
| 5                              | CYP17A1 | rs7089422  | 0.02       | 0.16       | 0.04      |
| 5                              | CYP17A1 | rs743572   | 0.95       | 0.92       | 0.24      |
| 6                              | CYP19A1 | rs10046    | 0.009      | 0.005      | 0.13      |

|    |         |            |          |        |       |
|----|---------|------------|----------|--------|-------|
| 6  | CYP19A1 | rs1004983  | 0.34     | 0.70   | 0.26  |
| 6  | CYP19A1 | rs10459592 | 0.06     | 0.02   | 0.72  |
| 6  | CYP19A1 | rs10519295 | 0.007    | 0.14   | 0.86  |
| 6  | CYP19A1 | rs10851498 | 0.01     | 0.009  | 0.18  |
| 6  | CYP19A1 | rs12591359 | 0.09     | 0.09   | 0.86  |
| 6  | CYP19A1 | rs17523880 | 0.04     | 0.007  | 0.34  |
| 6  | CYP19A1 | rs17523922 | 0.27     | 0.56   | 0.81  |
| 6  | CYP19A1 | rs1870050  | 0.63     | 0.18   | 0.06  |
| 6  | CYP19A1 | rs1902584  | 0.73     | 0.44   | 0.71  |
| 6  | CYP19A1 | rs1961177  | 0.45     | 0.23   | 0.57  |
| 6  | CYP19A1 | rs2008691  | 0.90     | 0.27   | 0.85  |
| 6  | CYP19A1 | rs2445762  | 0.61     | 0.53   | 0.90  |
| 6  | CYP19A1 | rs2445768  | 0.26     | 0.06   | 0.53  |
| 6  | CYP19A1 | rs2470144  | 0.09     | 0.70   | 0.68  |
| 6  | CYP19A1 | rs2470152  | 0.000002 | 0.0009 | 0.11  |
| 6  | CYP19A1 | rs2470157  | 0.07     | 0.74   | 0.78  |
| 6  | CYP19A1 | rs2899470  | 0.0004   | 0.002  | 0.14  |
| 6  | CYP19A1 | rs2899472  | 0.001    | 0.0005 | 0.71  |
| 6  | CYP19A1 | rs3751591  | 0.03     | 0.02   | 0.42  |
| 6  | CYP19A1 | rs3751592  | 0.94     | 0.13   | 0.88  |
| 6  | CYP19A1 | rs3889391  | 0.002    | 0.006  | 0.17  |
| 6  | CYP19A1 | rs4275794  | 0.57     | 0.08   | 0.95  |
| 6  | CYP19A1 | rs4646     | 0.02     | 0.12   | 0.10  |
| 6  | CYP19A1 | rs4774585  | 0.84     | 0.09   | 0.28  |
| 6  | CYP19A1 | rs6493487  | 0.06     | 0.003  | 0.95  |
| 6  | CYP19A1 | rs700518   | 0.02     | 0.04   | 0.16  |
| 6  | CYP19A1 | rs7172156  | 0.007    | 0.001  | 0.07  |
| 6  | CYP19A1 | rs7174997  | 0.65     | 0.56   | 0.52  |
| 6  | CYP19A1 | rs727479   | 0.004    | 0.006  | 0.72  |
| 6  | CYP19A1 | rs767199   | 0.02     | 0.0496 | 0.09  |
| 6  | CYP19A1 | rs8025374  | 0.25     | 0.17   | 0.03  |
| 6  | CYP19A1 | rs8031463  | 0.003    | 0.06   | 0.94  |
| 6  | CYP19A1 | rs934633   | 0.33     | 0.59   | 0.01  |
| 7  | CYP1A1  | rs1799814  | 0.95     | 0.94   | 0.10  |
| 7  | CYP1A1  | rs2470893  | 0.23     | 0.37   | 0.009 |
| 7  | CYP1A1  | rs4646421  | 0.94     | 0.95   | 0.94  |
| 8  | CYP1A2  | rs762551   | 0.31     | 0.99   | 0.048 |
| 9  | CYP1B1  | rs10175338 | 0.53     | 0.79   | 0.77  |
| 9  | CYP1B1  | rs1056836  | 0.91     | 0.96   | 0.83  |
| 9  | CYP1B1  | rs10916    | 0.83     | 0.69   | 0.26  |
| 9  | CYP1B1  | rs162556   | 0.46     | 0.76   | 0.94  |
| 9  | CYP1B1  | rs2256327  | 0.70     | 0.60   | 0.27  |
| 10 | CYP2C9  | rs1057910  | 0.76     | 0.58   | 0.82  |
| 10 | CYP2C9  | rs12251688 | 0.78     | 0.88   | 0.70  |
| 10 | CYP2C9  | rs1505     | 0.51     | 0.48   | 0.52  |
| 10 | CYP2C9  | rs1934963  | 0.64     | 0.81   | 0.96  |
| 10 | CYP2C9  | rs1934967  | 0.67     | 0.74   | 0.64  |
| 10 | CYP2C9  | rs1934968  | 0.49     | 0.82   | 0.27  |
| 10 | CYP2C9  | rs2185570  | 0.74     | 0.48   | 0.71  |
| 10 | CYP2C9  | rs2253635  | 0.63     | 0.66   | 0.52  |
| 10 | CYP2C9  | rs2298037  | 0.27     | 0.37   | 0.39  |
| 10 | CYP2C9  | rs2475377  | 0.28     | 0.63   | 0.27  |
| 10 | CYP2C9  | rs9332197  | 0.90     | 0.71   | 0.29  |

|    |        |            |      |      |      |
|----|--------|------------|------|------|------|
| 11 | CYP3A4 | rs12333983 | 0.48 | 0.33 | 0.36 |
| 11 | CYP3A4 | rs2242480  | 0.63 | 0.35 | 0.37 |
| 12 | CYP3A5 | rs15524    | 0.59 | 0.81 | 0.35 |
| 12 | CYP3A5 | rs4646450  | 0.45 | 0.09 | 0.62 |
| 13 | ESR1   | rs10484922 | 0.38 | 0.63 | 0.86 |
| 13 | ESR1   | rs1062577  | 0.84 | 0.79 | 0.17 |
| 13 | ESR1   | rs11964281 | 0.43 | 0.65 | 0.92 |
| 13 | ESR1   | rs11964865 | 0.56 | 0.22 | 0.47 |
| 13 | ESR1   | rs12154178 | 0.23 | 0.36 | 0.57 |
| 13 | ESR1   | rs12199102 | 0.51 | 0.50 | 0.15 |
| 13 | ESR1   | rs12212176 | 0.40 | 0.94 | 0.14 |
| 13 | ESR1   | rs1543403  | 0.78 | 0.31 | 0.88 |
| 13 | ESR1   | rs1709182  | 0.58 | 0.52 | 0.17 |
| 13 | ESR1   | rs1709183  | 0.51 | 0.44 | 0.22 |
| 13 | ESR1   | rs1884052  | 0.17 | 0.55 | 0.36 |
| 13 | ESR1   | rs1884054  | 0.08 | 0.45 | 0.22 |
| 13 | ESR1   | rs2144025  | 0.12 | 0.06 | 0.28 |
| 13 | ESR1   | rs2228480  | 0.52 | 0.52 | 0.42 |
| 13 | ESR1   | rs2234693  | 0.60 | 0.78 | 0.54 |
| 13 | ESR1   | rs2347867  | 0.06 | 0.08 | 0.04 |
| 13 | ESR1   | rs2747649  | 0.27 | 0.40 | 0.89 |
| 13 | ESR1   | rs2813543  | 0.37 | 0.62 | 0.88 |
| 13 | ESR1   | rs2881766  | 0.80 | 0.90 | 0.56 |
| 13 | ESR1   | rs2982712  | 0.62 | 0.48 | 0.69 |
| 13 | ESR1   | rs2982896  | 0.77 | 0.97 | 0.37 |
| 13 | ESR1   | rs2982900  | 0.59 | 0.12 | 0.16 |
| 13 | ESR1   | rs3003925  | 0.50 | 0.62 | 0.54 |
| 13 | ESR1   | rs3020314  | 0.09 | 0.18 | 0.20 |
| 13 | ESR1   | rs3020317  | 0.16 | 0.21 | 0.12 |
| 13 | ESR1   | rs3020328  | 0.22 | 0.30 | 0.53 |
| 13 | ESR1   | rs3020364  | 0.09 | 0.25 | 0.99 |
| 13 | ESR1   | rs3020368  | 1.00 | 0.36 | 0.22 |
| 13 | ESR1   | rs3020382  | 0.93 | 0.36 | 0.11 |
| 13 | ESR1   | rs3020383  | 0.72 | 0.14 | 0.33 |
| 13 | ESR1   | rs3020393  | 0.24 | 0.43 | 0.32 |
| 13 | ESR1   | rs3020404  | 0.27 | 0.26 | 0.07 |
| 13 | ESR1   | rs3020407  | 0.13 | 0.48 | 0.90 |
| 13 | ESR1   | rs3020410  | 0.41 | 0.77 | 0.18 |
| 13 | ESR1   | rs3020434  | 0.91 | 0.21 | 0.07 |
| 13 | ESR1   | rs3778099  | 0.03 | 0.09 | 0.04 |
| 13 | ESR1   | rs3798577  | 0.58 | 0.68 | 0.78 |
| 13 | ESR1   | rs3853248  | 0.56 | 0.51 | 0.74 |
| 13 | ESR1   | rs3936674  | 0.63 | 0.68 | 0.34 |
| 13 | ESR1   | rs488133   | 0.17 | 0.08 | 0.36 |
| 13 | ESR1   | rs6557170  | 0.59 | 0.44 | 0.16 |
| 13 | ESR1   | rs6914211  | 0.60 | 0.81 | 0.85 |
| 13 | ESR1   | rs7743290  | 0.09 | 0.14 | 0.71 |
| 13 | ESR1   | rs7754762  | 0.04 | 0.01 | 0.13 |
| 13 | ESR1   | rs7757956  | 0.85 | 0.22 | 0.14 |
| 13 | ESR1   | rs7761846  | 0.04 | 0.19 | 0.54 |
| 13 | ESR1   | rs827423   | 0.24 | 0.81 | 0.30 |
| 13 | ESR1   | rs926777   | 0.21 | 0.57 | 0.74 |
| 13 | ESR1   | rs9322335  | 0.80 | 0.63 | 0.46 |

|    |       |            |       |       |       |
|----|-------|------------|-------|-------|-------|
| 13 | ESR1  | rs9322336  | 0.39  | 0.74  | 0.12  |
| 13 | ESR1  | rs9340835  | 0.91  | 0.89  | 0.32  |
| 13 | ESR1  | rs9340941  | 0.99  | 0.86  | 0.97  |
| 13 | ESR1  | rs9340954  | 0.12  | 0.22  | 0.77  |
| 13 | ESR1  | rs9340955  | 0.56  | 0.22  | 0.47  |
| 13 | ESR1  | rs9340978  | 0.34  | 0.19  | 0.24  |
| 13 | ESR1  | rs9341019  | 0.16  | 0.48  | 0.42  |
| 13 | ESR1  | rs9341052  | 0.86  | 0.66  | 0.25  |
| 13 | ESR1  | rs9341066  | 0.89  | 0.63  | 0.82  |
| 13 | ESR1  | rs9397463  | 0.98  | 0.61  | 0.91  |
| 13 | ESR1  | rs9478265  | 0.24  | 0.14  | 0.56  |
| 13 | ESR1  | rs985192   | 0.33  | 0.34  | 0.32  |
| 13 | ESR1  | rs985694   | 0.14  | 0.28  | 0.39  |
| 13 | ESR1  | rs988328   | 0.67  | 0.18  | 0.45  |
| 14 | ESR2  | rs12435857 | 0.98  | 0.11  | 0.09  |
| 14 | ESR2  | rs1256030  | 0.56  | 0.08  | 0.08  |
| 14 | ESR2  | rs1256031  | 0.45  | 0.07  | 0.04  |
| 14 | ESR2  | rs1256044  | 0.52  | 0.06  | 0.10  |
| 14 | ESR2  | rs1256063  | 0.87  | 0.67  | 0.99  |
| 14 | ESR2  | rs1256064  | 0.44  | 0.74  | 0.66  |
| 14 | ESR2  | rs1887994  | 0.56  | 0.79  | 0.12  |
| 14 | ESR2  | rs1952586  | 0.33  | 0.65  | 1.00  |
| 14 | ESR2  | rs2978381  | 0.37  | 0.02  | 0.58  |
| 14 | ESR2  | rs3020450  | 0.62  | 0.02  | 0.45  |
| 14 | ESR2  | rs3783736  | 0.73  | 0.04  | 0.11  |
| 14 | ESR2  | rs7159462  | 0.21  | 0.76  | 0.43  |
| 14 | ESR2  | rs8003490  | 0.51  | 0.63  | 0.55  |
| 14 | ESR2  | rs8006145  | 0.96  | 0.07  | 0.43  |
| 14 | ESR2  | rs8017441  | 0.59  | 0.71  | 0.44  |
| 14 | ESR2  | rs944045   | 0.26  | 0.44  | 0.56  |
| 15 | ESRRA | rs11231745 | 0.56  | 0.83  | 0.45  |
| 15 | ESRRA | rs11600990 | 0.64  | 0.80  | 0.79  |
| 15 | ESRRA | rs731703   | 0.02  | 0.03  | 0.001 |
| 16 | ESRRB | rs10132091 | 0.74  | 0.34  | 0.27  |
| 16 | ESRRB | rs10135410 | 0.13  | 0.08  | 0.009 |
| 16 | ESRRB | rs10147732 | 0.98  | 0.59  | 0.62  |
| 16 | ESRRB | rs1077429  | 0.30  | 0.02  | 0.82  |
| 16 | ESRRB | rs10873288 | 0.65  | 0.58  | 0.70  |
| 16 | ESRRB | rs10873289 | 0.95  | 0.21  | 0.28  |
| 16 | ESRRB | rs11159197 | 0.17  | 0.49  | 0.39  |
| 16 | ESRRB | rs11159198 | 0.08  | 0.95  | 0.25  |
| 16 | ESRRB | rs11620876 | 0.52  | 0.17  | 0.72  |
| 16 | ESRRB | rs11622466 | 0.36  | 0.45  | 0.27  |
| 16 | ESRRB | rs11624925 | 0.53  | 0.10  | 0.71  |
| 16 | ESRRB | rs11625043 | 0.11  | 0.05  | 0.22  |
| 16 | ESRRB | rs11626258 | 0.33  | 0.42  | 0.23  |
| 16 | ESRRB | rs11845849 | 0.98  | 0.59  | 0.62  |
| 16 | ESRRB | rs12050313 | 0.046 | 0.008 | 0.97  |
| 16 | ESRRB | rs12100889 | 0.06  | 0.33  | 0.03  |
| 16 | ESRRB | rs12590670 | 0.19  | 0.43  | 0.93  |
| 16 | ESRRB | rs12880655 | 0.07  | 0.25  | 0.20  |
| 16 | ESRRB | rs12880920 | 0.32  | 0.42  | 0.78  |
| 16 | ESRRB | rs12883849 | 0.87  | 0.13  | 0.78  |

|    |       |            |       |       |       |
|----|-------|------------|-------|-------|-------|
| 16 | ESRRB | rs17497770 | 0.87  | 0.80  | 0.16  |
| 16 | ESRRB | rs1867653  | 0.66  | 0.009 | 1.00  |
| 16 | ESRRB | rs1867654  | 0.56  | 0.28  | 0.80  |
| 16 | ESRRB | rs1867655  | 0.40  | 0.14  | 0.93  |
| 16 | ESRRB | rs2361286  | 0.60  | 0.04  | 0.80  |
| 16 | ESRRB | rs2361288  | 0.36  | 0.11  | 1.00  |
| 16 | ESRRB | rs2361289  | 0.92  | 0.15  | 0.42  |
| 16 | ESRRB | rs2361290  | 0.32  | 0.08  | 0.57  |
| 16 | ESRRB | rs2361291  | 0.24  | 0.22  | 0.30  |
| 16 | ESRRB | rs2361330  | 0.16  | 0.70  | 0.52  |
| 16 | ESRRB | rs2921451  | 0.99  | 0.15  | 0.66  |
| 16 | ESRRB | rs2980894  | 0.37  | 0.33  | 0.60  |
| 16 | ESRRB | rs2980895  | 0.93  | 0.03  | 0.85  |
| 16 | ESRRB | rs2980896  | 0.88  | 0.01  | 0.25  |
| 16 | ESRRB | rs3742754  | 0.52  | 0.09  | 0.95  |
| 16 | ESRRB | rs3813545  | 0.90  | 0.33  | 0.38  |
| 16 | ESRRB | rs4427728  | 0.67  | 0.045 | 0.61  |
| 16 | ESRRB | rs4903413  | 0.83  | 0.62  | 0.85  |
| 16 | ESRRB | rs6574292  | 0.11  | 0.15  | 0.90  |
| 16 | ESRRB | rs6574293  | 0.58  | 0.02  | 0.67  |
| 16 | ESRRB | rs6574294  | 0.45  | 0.42  | 0.60  |
| 16 | ESRRB | rs7140182  | 0.86  | 0.11  | 0.08  |
| 16 | ESRRB | rs7149569  | 0.91  | 0.56  | 0.57  |
| 16 | ESRRB | rs7150423  | 0.87  | 0.99  | 0.88  |
| 16 | ESRRB | rs7152540  | 0.004 | 0.01  | 0.29  |
| 16 | ESRRB | rs7154927  | 0.29  | 0.01  | 0.58  |
| 16 | ESRRB | rs7160216  | 0.26  | 0.06  | 0.22  |
| 16 | ESRRB | rs730452   | 0.85  | 0.95  | 0.43  |
| 16 | ESRRB | rs733486   | 0.75  | 0.53  | 0.41  |
| 16 | ESRRB | rs745011   | 0.23  | 0.01  | 0.95  |
| 16 | ESRRB | rs748379   | 0.35  | 0.51  | 0.80  |
| 16 | ESRRB | rs8010081  | 0.40  | 0.92  | 0.34  |
| 16 | ESRRB | rs8012921  | 0.57  | 0.76  | 0.68  |
| 16 | ESRRB | rs8021398  | 0.65  | 0.36  | 0.95  |
| 16 | ESRRB | rs935344   | 0.27  | 0.12  | 0.63  |
| 16 | ESRRB | rs9944093  | 0.74  | 0.36  | 0.40  |
| 17 | FSHB  | rs1716022  | 0.42  | 0.15  | 0.58  |
| 17 | FSHB  | rs1782507  | 0.56  | 0.51  | 0.09  |
| 17 | FSHB  | rs621686   | 1.00  | 0.77  | 0.38  |
| 18 | FSHR  | rs1007540  | 0.56  | 0.43  | 0.05  |
| 18 | FSHR  | rs10490118 | 0.38  | 0.44  | 0.18  |
| 18 | FSHR  | rs10495963 | 0.28  | 0.26  | 0.22  |
| 18 | FSHR  | rs10865238 | 0.04  | 0.29  | 0.004 |
| 18 | FSHR  | rs11693287 | 0.09  | 0.29  | 0.31  |
| 18 | FSHR  | rs11694529 | 0.85  | 0.58  | 0.96  |
| 18 | FSHR  | rs12465332 | 0.35  | 0.72  | 0.09  |
| 18 | FSHR  | rs12623845 | 0.02  | 0.09  | 0.02  |
| 18 | FSHR  | rs12713027 | 0.18  | 0.15  | 0.22  |
| 18 | FSHR  | rs1277459  | 0.49  | 0.57  | 0.69  |
| 18 | FSHR  | rs1277460  | 0.06  | 0.16  | 0.002 |
| 18 | FSHR  | rs1290100  | 0.23  | 0.50  | 0.26  |
| 18 | FSHR  | rs12996623 | 0.11  | 0.02  | 0.26  |
| 18 | FSHR  | rs12997223 | 0.01  | 0.13  | 0.02  |

|    |       |            |      |       |         |
|----|-------|------------|------|-------|---------|
| 18 | FSHR  | rs13010134 | 0.07 | 0.04  | 0.32    |
| 18 | FSHR  | rs13389334 | 0.65 | 0.74  | 0.57    |
| 18 | FSHR  | rs1394207  | 0.06 | 0.67  | 0.02    |
| 18 | FSHR  | rs1504174  | 0.15 | 0.08  | 0.22    |
| 18 | FSHR  | rs1504186  | 0.06 | 0.03  | 0.13    |
| 18 | FSHR  | rs1504189  | 0.02 | 0.002 | 0.02    |
| 18 | FSHR  | rs1504190  | 0.12 | 0.80  | 0.008   |
| 18 | FSHR  | rs1553476  | 0.22 | 0.06  | 0.54    |
| 18 | FSHR  | rs1558607  | 0.53 | 0.80  | 0.40    |
| 18 | FSHR  | rs17038059 | 0.03 | 0.23  | 0.06    |
| 18 | FSHR  | rs17038087 | 0.01 | 0.09  | 0.09    |
| 18 | FSHR  | rs17038110 | 0.53 | 0.50  | 0.38    |
| 18 | FSHR  | rs17038379 | 0.01 | 0.03  | 0.05    |
| 18 | FSHR  | rs17823341 | 0.65 | 0.62  | 0.47    |
| 18 | FSHR  | rs1910564  | 0.01 | 0.05  | 0.01    |
| 18 | FSHR  | rs2058595  | 0.86 | 0.54  | 0.63    |
| 18 | FSHR  | rs2072485  | 0.60 | 0.76  | 0.94    |
| 18 | FSHR  | rs2072486  | 0.82 | 0.82  | 0.61    |
| 18 | FSHR  | rs2268362  | 0.86 | 0.40  | 0.41    |
| 18 | FSHR  | rs2284674  | 0.87 | 0.50  | 0.68    |
| 18 | FSHR  | rs2300437  | 0.11 | 0.26  | 0.24    |
| 18 | FSHR  | rs2300438  | 0.72 | 0.15  | 0.09    |
| 18 | FSHR  | rs2300440  | 0.54 | 0.72  | 0.81    |
| 18 | FSHR  | rs2349415  | 0.02 | 0.08  | 0.008   |
| 18 | FSHR  | rs2349710  | 0.02 | 0.11  | 0.0005  |
| 18 | FSHR  | rs3788982  | 0.23 | 0.64  | 0.73    |
| 18 | FSHR  | rs4510264  | 0.02 | 0.25  | 0.00008 |
| 18 | FSHR  | rs4971637  | 0.21 | 0.50  | 0.05    |
| 18 | FSHR  | rs6166     | 0.82 | 0.23  | 0.45    |
| 18 | FSHR  | rs6545087  | 0.09 | 0.11  | 0.08    |
| 18 | FSHR  | rs6545094  | 0.09 | 0.08  | 0.003   |
| 18 | FSHR  | rs6705106  | 0.75 | 0.78  | 0.64    |
| 18 | FSHR  | rs6724851  | 0.01 | 0.09  | 0.0008  |
| 18 | FSHR  | rs7559066  | 0.56 | 0.28  | 0.55    |
| 18 | FSHR  | rs7577214  | 0.06 | 0.04  | 0.08    |
| 18 | FSHR  | rs759287   | 0.18 | 0.55  | 0.38    |
| 18 | FSHR  | rs905668   | 0.15 | 0.65  | 0.007   |
| 18 | FSHR  | rs917944   | 0.10 | 0.05  | 0.03    |
| 18 | FSHR  | rs9309159  | 0.55 | 0.85  | 0.06    |
| 18 | FSHR  | rs958974   | 0.02 | 0.04  | 0.01    |
| 18 | FSHR  | rs974897   | 0.03 | 0.44  | 0.002   |
| 18 | FSHR  | rs9808506  | 0.73 | 0.75  | 0.10    |
| 19 | GNRH1 | rs17201112 | 0.43 | 0.97  | 0.25    |
| 19 | GNRH1 | rs17790824 | 0.81 | 0.77  | 0.32    |
| 19 | GNRH1 | rs1876281  | 0.28 | 0.30  | 0.36    |
| 19 | GNRH1 | rs2659590  | 0.68 | 0.27  | 0.46    |
| 19 | GNRH1 | rs6185     | 0.07 | 0.59  | 0.07    |
| 20 | GNRH2 | rs15659    | 0.07 | 0.46  | 0.08    |
| 20 | GNRH2 | rs3761243  | 0.14 | 0.20  | 0.12    |
| 20 | GNRH2 | rs566570   | 0.18 | 0.69  | 0.19    |
| 20 | GNRH2 | rs6051545  | 0.58 | 0.47  | 0.76    |
| 20 | GNRH2 | rs6115763  | 0.49 | 0.87  | 0.04    |
| 20 | GNRH2 | rs676749   | 0.40 | 0.82  | 0.19    |

|    |         |            |       |      |       |
|----|---------|------------|-------|------|-------|
| 21 | GNRHR   | rs10005857 | 0.59  | 0.56 | 0.40  |
| 21 | GNRHR   | rs1843593  | 0.69  | 0.98 | 0.79  |
| 21 | GNRHR   | rs2711144  | 0.44  | 0.97 | 0.95  |
| 21 | GNRHR   | rs3796718  | 0.14  | 0.03 | 0.36  |
| 21 | GNRHR   | rs3796720  | 0.59  | 0.04 | 0.70  |
| 21 | GNRHR   | rs3822196  | 0.19  | 0.06 | 0.29  |
| 21 | GNRHR   | rs3828562  | 0.21  | 0.08 | 0.41  |
| 21 | GNRHR   | rs6552115  | 0.91  | 0.82 | 0.47  |
| 21 | GNRHR   | rs6828922  | 0.96  | 0.45 | 0.41  |
| 21 | GNRHR   | rs972072   | 0.39  | 0.38 | 0.71  |
| 21 | GNRHR   | rs974483   | 0.76  | 0.29 | 0.89  |
| 22 | GPR30   | rs3808350  | 0.53  | 0.93 | 0.49  |
| 22 | GPR30   | rs4285396  | 0.92  | 0.43 | 0.25  |
| 23 | HSD17B1 | rs12602084 | 0.76  | 0.36 | 0.56  |
| 23 | HSD17B1 | rs597255   | 0.36  | 0.19 | 0.52  |
| 23 | HSD17B1 | rs676387   | 0.95  | 0.14 | 0.84  |
| 24 | HSD17B2 | rs10514524 | 0.41  | 0.82 | 0.58  |
| 24 | HSD17B2 | rs1364283  | 0.31  | 0.50 | 0.82  |
| 24 | HSD17B2 | rs2042429  | 0.04  | 0.02 | 0.04  |
| 24 | HSD17B2 | rs2955162  | 0.20  | 0.10 | 0.008 |
| 24 | HSD17B2 | rs2955163  | 0.29  | 0.94 | 0.41  |
| 24 | HSD17B2 | rs2966245  | 0.17  | 0.02 | 0.02  |
| 24 | HSD17B2 | rs2966248  | 0.98  | 0.54 | 0.09  |
| 24 | HSD17B2 | rs3887358  | 0.53  | 0.62 | 0.27  |
| 24 | HSD17B2 | rs4243229  | 0.44  | 0.14 | 0.16  |
| 24 | HSD17B2 | rs4291899  | 0.47  | 0.34 | 0.63  |
| 24 | HSD17B2 | rs7201637  | 0.71  | 0.42 | 0.85  |
| 24 | HSD17B2 | rs723012   | 0.84  | 0.57 | 0.18  |
| 24 | HSD17B2 | rs8191225  | 0.98  | 0.72 | 0.92  |
| 24 | HSD17B2 | rs8191248  | 0.95  | 0.68 | 0.13  |
| 24 | HSD17B2 | rs996752   | 0.81  | 0.71 | 0.19  |
| 25 | HSD17B3 | rs10739847 | 0.65  | 0.34 | 0.22  |
| 25 | HSD17B3 | rs1119864  | 0.77  | 0.30 | 0.17  |
| 25 | HSD17B3 | rs11788785 | 0.71  | 0.75 | 0.95  |
| 25 | HSD17B3 | rs1324196  | 0.83  | 0.57 | 0.62  |
| 25 | HSD17B3 | rs1887774  | 0.96  | 0.94 | 0.50  |
| 25 | HSD17B3 | rs1927886  | 0.48  | 0.24 | 0.16  |
| 25 | HSD17B3 | rs2026001  | 0.25  | 0.73 | 0.33  |
| 25 | HSD17B3 | rs2066475  | 0.14  | 0.04 | 0.45  |
| 25 | HSD17B3 | rs2253502  | 0.51  | 0.36 | 0.42  |
| 25 | HSD17B3 | rs2257157  | 0.98  | 0.20 | 0.99  |
| 25 | HSD17B3 | rs2476923  | 0.05  | 0.25 | 0.09  |
| 25 | HSD17B3 | rs2476927  | 0.88  | 0.68 | 0.24  |
| 25 | HSD17B3 | rs2479828  | 0.18  | 0.62 | 0.96  |
| 25 | HSD17B3 | rs394243   | 0.36  | 0.39 | 0.74  |
| 25 | HSD17B3 | rs7029101  | 0.57  | 0.96 | 0.35  |
| 25 | HSD17B3 | rs8190512  | 0.96  | 0.93 | 0.39  |
| 25 | HSD17B3 | rs8190534  | 0.17  | 0.53 | 0.56  |
| 25 | HSD17B3 | rs8190536  | 0.10  | 0.03 | 0.31  |
| 25 | HSD17B3 | rs8190557  | 0.31  | 0.08 | 0.94  |
| 25 | HSD17B3 | rs8190581  | 0.23  | 0.11 | 0.78  |
| 25 | HSD17B3 | rs9409407  | 0.008 | 0.32 | 0.09  |
| 26 | HSD17B4 | rs10064000 | 0.73  | 0.80 | 0.13  |

|    |          |            |      |      |       |
|----|----------|------------|------|------|-------|
| 26 | HSD17B4  | rs10478424 | 0.02 | 0.01 | 0.11  |
| 26 | HSD17B4  | rs11205    | 0.94 | 0.80 | 0.34  |
| 26 | HSD17B4  | rs11749784 | 0.42 | 0.08 | 0.65  |
| 26 | HSD17B4  | rs17145477 | 0.87 | 0.48 | 0.64  |
| 26 | HSD17B4  | rs17388769 | 0.65 | 0.40 | 0.14  |
| 26 | HSD17B4  | rs32651    | 0.54 | 0.96 | 0.18  |
| 26 | HSD17B4  | rs3756513  | 0.43 | 0.19 | 0.93  |
| 26 | HSD17B4  | rs3797371  | 0.33 | 0.13 | 0.96  |
| 26 | HSD17B4  | rs382719   | 0.46 | 0.78 | 0.15  |
| 26 | HSD17B4  | rs3850200  | 0.58 | 0.67 | 0.12  |
| 26 | HSD17B4  | rs442923   | 0.63 | 0.44 | 0.07  |
| 26 | HSD17B4  | rs6897978  | 0.12 | 0.07 | 0.24  |
| 26 | HSD17B4  | rs6898518  | 0.37 | 0.06 | 0.66  |
| 26 | HSD17B4  | rs7706359  | 0.95 | 0.47 | 0.35  |
| 26 | HSD17B4  | rs7723390  | 0.64 | 0.59 | 0.81  |
| 27 | HSD17B6  | rs10876920 | 0.19 | 0.71 | 0.07  |
| 27 | HSD17B6  | rs12809466 | 0.18 | 0.37 | 0.26  |
| 27 | HSD17B6  | rs6581104  | 0.75 | 0.27 | 0.68  |
| 27 | HSD17B6  | rs7980317  | 0.04 | 0.78 | 0.15  |
| 28 | HSD17B7  | rs1039874  | 0.09 | 0.10 | 0.32  |
| 28 | HSD17B7  | rs11589262 | 0.88 | 0.60 | 0.91  |
| 28 | HSD17B7  | rs2803865  | 0.96 | 0.69 | 0.65  |
| 28 | HSD17B7  | rs2805053  | 0.76 | 0.42 | 0.92  |
| 28 | HSD17B7  | rs4656381  | 0.77 | 0.64 | 0.82  |
| 29 | HSD17B8  | rs1547387  | 0.75 | 0.83 | 0.75  |
| 29 | HSD17B8  | rs213210   | 0.14 | 0.44 | 0.004 |
| 29 | HSD17B8  | rs6531     | 0.75 | 0.82 | 0.68  |
| 30 | HSD17B10 | rs1264016  | 0.84 | 0.28 | 0.30  |
| 31 | HSD17B12 | rs10501303 | 0.64 | 0.37 | 0.77  |
| 31 | HSD17B12 | rs10768989 | 0.92 | 0.39 | 0.84  |
| 31 | HSD17B12 | rs10838176 | 0.51 | 0.15 | 0.85  |
| 31 | HSD17B12 | rs11037556 | 0.36 | 0.18 | 0.81  |
| 31 | HSD17B12 | rs11037567 | 0.80 | 0.88 | 0.94  |
| 31 | HSD17B12 | rs11037589 | 0.65 | 0.37 | 0.74  |
| 31 | HSD17B12 | rs11037662 | 0.70 | 0.57 | 0.93  |
| 31 | HSD17B12 | rs12800235 | 0.94 | 0.99 | 0.94  |
| 31 | HSD17B12 | rs1518820  | 0.35 | 0.97 | 0.63  |
| 31 | HSD17B12 | rs16937624 | 0.62 | 0.90 | 0.72  |
| 31 | HSD17B12 | rs17597526 | 0.75 | 0.50 | 0.76  |
| 31 | HSD17B12 | rs17598687 | 0.28 | 0.23 | 0.78  |
| 31 | HSD17B12 | rs17599114 | 0.28 | 0.23 | 0.78  |
| 31 | HSD17B12 | rs2037296  | 0.31 | 0.10 | 0.91  |
| 31 | HSD17B12 | rs4755737  | 0.30 | 0.07 | 0.95  |
| 31 | HSD17B12 | rs6485443  | 0.67 | 0.88 | 0.80  |
| 31 | HSD17B12 | rs6485453  | 0.85 | 0.87 | 0.66  |
| 31 | HSD17B12 | rs7110523  | 0.56 | 0.25 | 0.53  |
| 31 | HSD17B12 | rs7118659  | 0.78 | 0.53 | 0.83  |
| 31 | HSD17B12 | rs7120753  | 0.40 | 0.52 | 0.52  |
| 32 | HSD17B13 | rs13112695 | 0.33 | 0.31 | 0.58  |
| 32 | HSD17B13 | rs4089     | 0.61 | 0.95 | 0.36  |
| 32 | HSD17B13 | rs6531973  | 0.52 | 0.84 | 0.57  |
| 32 | HSD17B13 | rs6850509  | 0.72 | 0.35 | 0.24  |
| 32 | HSD17B13 | rs7674658  | 0.39 | 0.67 | 0.20  |



|    |          |            |       |      |      |
|----|----------|------------|-------|------|------|
| 32 | HSD17B13 | rs9647458  | 0.60  | 0.35 | 0.39 |
| 33 | HSD3B1   | rs1812256  | 0.42  | 0.32 | 0.28 |
| 33 | HSD3B1   | rs6203     | 0.13  | 0.36 | 0.02 |
| 33 | HSD3B1   | rs6428830  | 0.27  | 0.28 | 0.21 |
| 34 | HSD3B2   | rs12141041 | 0.74  | 0.63 | 0.61 |
| 34 | HSD3B2   | rs1341018  | 0.94  | 0.39 | 0.78 |
| 34 | HSD3B2   | rs1361530  | 0.56  | 0.55 | 0.98 |
| 34 | HSD3B2   | rs1856886  | 0.56  | 0.38 | 0.60 |
| 34 | HSD3B2   | rs4659175  | 0.78  | 0.88 | 0.81 |
| 35 | INHA     | rs1039898  | 1.00  | 0.71 | 0.46 |
| 35 | INHA     | rs2059693  | 0.33  | 0.99 | 0.19 |
| 35 | INHA     | rs7588807  | 0.90  | 0.45 | 0.21 |
| 35 | INHA     | rs907141   | 0.32  | 0.38 | 0.85 |
| 36 | INHBA    | rs1003291  | 0.41  | 0.45 | 0.23 |
| 36 | INHBA    | rs1122291  | 0.68  | 0.57 | 0.80 |
| 36 | INHBA    | rs11770488 | 0.55  | 0.35 | 0.10 |
| 36 | INHBA    | rs2007475  | 0.84  | 0.29 | 0.58 |
| 36 | INHBA    | rs2237435  | 0.92  | 0.37 | 0.53 |
| 36 | INHBA    | rs2237436  | 0.74  | 0.50 | 0.55 |
| 36 | INHBA    | rs2877098  | 0.88  | 0.45 | 0.36 |
| 36 | INHBA    | rs3801158  | 0.74  | 0.17 | 0.90 |
| 36 | INHBA    | rs998190   | 0.33  | 0.81 | 0.55 |
| 37 | INHBB    | rs11902591 | 0.70  | 0.24 | 0.86 |
| 37 | INHBB    | rs745723   | 0.91  | 0.25 | 0.90 |
| 37 | INHBB    | rs7578624  | 0.70  | 0.74 | 0.08 |
| 37 | INHBB    | rs7581178  | 0.80  | 0.95 | 0.14 |
| 37 | INHBB    | rs7589138  | 0.58  | 0.61 | 0.32 |
| 38 | LHB      | rs7256062  | 0.44  | 0.46 | 0.27 |
| 38 | LHB      | rs753307   | 0.72  | 0.96 | 0.12 |
| 39 | LHCGR    | rs11125179 | 0.76  | 0.35 | 0.33 |
| 39 | LHCGR    | rs11689544 | 0.88  | 0.09 | 0.42 |
| 39 | LHCGR    | rs11691408 | 0.33  | 0.59 | 0.22 |
| 39 | LHCGR    | rs12468825 | 0.11  | 0.15 | 0.11 |
| 39 | LHCGR    | rs12478799 | 0.01  | 0.28 | 0.07 |
| 39 | LHCGR    | rs12618729 | 0.006 | 0.33 | 0.02 |
| 39 | LHCGR    | rs13019537 | 1.00  | 0.53 | 0.43 |
| 39 | LHCGR    | rs13421618 | 0.01  | 0.07 | 0.23 |
| 39 | LHCGR    | rs13432488 | 0.80  | 0.87 | 0.95 |
| 39 | LHCGR    | rs17037563 | 0.55  | 0.22 | 0.44 |
| 39 | LHCGR    | rs17326321 | 0.77  | 0.51 | 0.98 |
| 39 | LHCGR    | rs17326656 | 0.27  | 0.60 | 0.03 |
| 39 | LHCGR    | rs17398156 | 0.77  | 0.86 | 0.50 |
| 39 | LHCGR    | rs17398267 | 0.08  | 0.91 | 0.09 |
| 39 | LHCGR    | rs17398392 | 0.86  | 0.83 | 0.97 |
| 39 | LHCGR    | rs2956355  | 0.78  | 0.98 | 0.61 |
| 39 | LHCGR    | rs4074648  | 0.21  | 0.46 | 0.60 |
| 39 | LHCGR    | rs4131885  | 0.04  | 0.61 | 0.68 |
| 39 | LHCGR    | rs4131886  | 0.61  | 0.79 | 0.13 |
| 39 | LHCGR    | rs4293599  | 0.008 | 0.08 | 0.20 |
| 39 | LHCGR    | rs4297936  | 0.41  | 0.59 | 0.63 |
| 39 | LHCGR    | rs4366951  | 0.75  | 0.31 | 0.99 |
| 39 | LHCGR    | rs4374421  | 0.38  | 0.73 | 0.14 |
| 39 | LHCGR    | rs4465809  | 0.27  | 0.80 | 0.75 |

|    |        |            |        |      |        |
|----|--------|------------|--------|------|--------|
| 39 | LHCGR  | rs4490239  | 0.049  | 0.92 | 0.02   |
| 39 | LHCGR  | rs4574159  | 0.06   | 0.72 | 0.13   |
| 39 | LHCGR  | rs4597581  | 0.30   | 0.30 | 0.15   |
| 39 | LHCGR  | rs4637174  | 0.48   | 0.96 | 0.04   |
| 39 | LHCGR  | rs4952922  | 0.02   | 0.36 | 0.58   |
| 39 | LHCGR  | rs4952923  | 0.02   | 0.53 | 0.55   |
| 39 | LHCGR  | rs4953611  | 0.38   | 0.68 | 0.47   |
| 39 | LHCGR  | rs4953616  | 0.0005 | 0.11 | 0.002  |
| 39 | LHCGR  | rs4953617  | 0.23   | 0.54 | 0.42   |
| 39 | LHCGR  | rs4953624  | 0.13   | 0.53 | 0.46   |
| 39 | LHCGR  | rs6744967  | 0.02   | 0.23 | 0.01   |
| 39 | LHCGR  | rs6752933  | 0.02   | 0.03 | 0.11   |
| 39 | LHCGR  | rs6755901  | 0.60   | 0.54 | 0.82   |
| 39 | LHCGR  | rs7371084  | 0.007  | 0.20 | 0.04   |
| 39 | LHCGR  | rs7561278  | 0.04   | 0.13 | 0.34   |
| 39 | LHCGR  | rs7562693  | 0.34   | 1.00 | 0.51   |
| 39 | LHCGR  | rs7584253  | 0.07   | 0.77 | 0.09   |
| 40 | SHBG   | rs13894    | 0.67   | 0.87 | 0.02   |
| 40 | SHBG   | rs1641544  | 0.82   | 0.89 | 0.25   |
| 40 | SHBG   | rs2955617  | 0.39   | 0.95 | 0.41   |
| 40 | SHBG   | rs6258     | 0.41   | 0.69 | 0.0003 |
| 40 | SHBG   | rs6259     | 0.17   | 0.95 | 0.04   |
| 40 | SHBG   | rs727428   | 0.84   | 0.64 | 0.06   |
| 40 | SHBG   | rs858521   | 0.18   | 0.41 | 0.04   |
| 41 | SRD5A1 | rs16877779 | 0.55   | 0.71 | 0.50   |
| 41 | SRD5A1 | rs30434    | 0.64   | 0.42 | 0.91   |
| 41 | SRD5A1 | rs39847    | 0.92   | 0.94 | 0.25   |
| 41 | SRD5A1 | rs39848    | 0.78   | 0.76 | 0.61   |
| 41 | SRD5A1 | rs4702378  | 0.30   | 0.42 | 0.27   |
| 41 | SRD5A1 | rs471604   | 0.85   | 0.83 | 0.88   |
| 41 | SRD5A1 | rs501999   | 0.29   | 0.15 | 0.36   |
| 41 | SRD5A1 | rs518673   | 0.33   | 0.14 | 0.11   |
| 41 | SRD5A1 | rs6874005  | 0.04   | 0.06 | 0.15   |
| 42 | SRD5A2 | rs12470143 | 0.18   | 0.29 | 0.28   |
| 42 | SRD5A2 | rs2208532  | 0.26   | 0.54 | 0.09   |
| 42 | SRD5A2 | rs2268794  | 0.79   | 0.11 | 0.70   |
| 42 | SRD5A2 | rs2300703  | 0.97   | 0.41 | 0.98   |
| 42 | SRD5A2 | rs3754838  | 0.60   | 0.02 | 0.59   |
| 42 | SRD5A2 | rs4952222  | 0.46   | 0.81 | 0.32   |
| 42 | SRD5A2 | rs612224   | 0.77   | 0.62 | 0.55   |
| 42 | SRD5A2 | rs7562326  | 0.77   | 0.03 | 0.61   |
| 42 | SRD5A2 | rs7571644  | 0.70   | 0.33 | 0.76   |
| 42 | SRD5A2 | rs806645   | 0.78   | 0.73 | 0.74   |
| 43 | STS    | rs1000900  | 0.71   | 0.61 | 0.62   |
| 43 | STS    | rs1131289  | 0.96   | 0.76 | 0.17   |
| 43 | STS    | rs17268988 | 0.73   | 0.42 | 0.99   |
| 43 | STS    | rs17331438 | 0.99   | 0.53 | 0.58   |
| 43 | STS    | rs4403552  | 0.32   | 0.59 | 0.06   |
| 43 | STS    | rs4595309  | 0.47   | 0.94 | 0.51   |
| 43 | STS    | rs5933863  | 0.90   | 0.82 | 0.30   |
| 43 | STS    | rs5934700  | 0.64   | 0.88 | 0.74   |
| 43 | STS    | rs5979338  | 0.71   | 0.61 | 0.62   |
| 43 | STS    | rs6639825  | 0.94   | 0.78 | 0.16   |

|    |         |            |       |       |      |
|----|---------|------------|-------|-------|------|
| 44 | SULT1A1 | rs2411453  | 0.75  | 0.64  | 0.82 |
| 45 | SULT1E1 | rs11573763 | 0.92  | 0.57  | 0.50 |
| 45 | SULT1E1 | rs1220725  | 0.24  | 0.31  | 0.24 |
| 45 | SULT1E1 | rs13102618 | 0.41  | 0.10  | 0.48 |
| 45 | SULT1E1 | rs1590128  | 0.35  | 0.95  | 0.82 |
| 45 | SULT1E1 | rs1881668  | 0.31  | 0.50  | 0.95 |
| 45 | SULT1E1 | rs2331821  | 0.50  | 0.42  | 0.61 |
| 45 | SULT1E1 | rs3775777  | 0.41  | 0.10  | 0.48 |
| 45 | SULT1E1 | rs3822173  | 0.92  | 0.57  | 0.50 |
| 45 | SULT1E1 | rs4149525  | 0.07  | 0.96  | 0.32 |
| 45 | SULT1E1 | rs4149535  | 0.29  | 0.09  | 0.46 |
| 46 | SULT2A1 | rs182420   | 0.11  | 0.26  | 0.62 |
| 46 | SULT2A1 | rs188440   | 0.15  | 0.13  | 0.32 |
| 46 | SULT2A1 | rs212099   | 0.56  | 0.99  | 0.31 |
| 46 | SULT2A1 | rs2547238  | 0.80  | 0.55  | 0.58 |
| 46 | SULT2A1 | rs2910397  | 0.18  | 0.11  | 0.27 |
| 46 | SULT2A1 | rs4149448  | 0.28  | 0.03  | 0.73 |
| 46 | SULT2A1 | rs7508610  | 0.02  | 0.27  | 0.13 |
| 47 | SULT2B1 | rs10417472 | 0.03  | 0.03  | 0.83 |
| 47 | SULT2B1 | rs10426628 | 0.75  | 0.33  | 0.51 |
| 47 | SULT2B1 | rs1236093  | 0.02  | 0.21  | 0.98 |
| 47 | SULT2B1 | rs12460535 | 0.002 | 0.002 | 0.91 |
| 47 | SULT2B1 | rs12462337 | 0.84  | 0.10  | 0.41 |
| 47 | SULT2B1 | rs12611137 | 0.47  | 0.91  | 0.94 |
| 47 | SULT2B1 | rs2544785  | 0.41  | 0.18  | 0.76 |
| 47 | SULT2B1 | rs2544796  | 0.63  | 0.71  | 0.49 |
| 47 | SULT2B1 | rs2665579  | 0.40  | 0.24  | 0.61 |
| 47 | SULT2B1 | rs2665581  | 0.08  | 0.02  | 0.29 |
| 47 | SULT2B1 | rs2665582  | 0.15  | 0.02  | 0.29 |
| 47 | SULT2B1 | rs2665601  | 0.70  | 0.42  | 0.97 |
| 47 | SULT2B1 | rs2665605  | 0.51  | 0.32  | 0.88 |
| 47 | SULT2B1 | rs279451   | 0.77  | 0.35  | 0.95 |
| 47 | SULT2B1 | rs3745726  | 0.32  | 0.26  | 0.23 |
| 47 | SULT2B1 | rs3760802  | 0.40  | 0.74  | 0.57 |
| 47 | SULT2B1 | rs3760804  | 0.48  | 0.35  | 0.48 |
| 47 | SULT2B1 | rs3760808  | 0.13  | 0.28  | 0.91 |
| 47 | SULT2B1 | rs3826827  | 0.51  | 0.85  | 0.61 |
| 47 | SULT2B1 | rs4149455  | 0.14  | 0.34  | 0.79 |
| 47 | SULT2B1 | rs6509396  | 0.07  | 0.49  | 0.65 |
| 47 | SULT2B1 | rs8108904  | 0.06  | 0.67  | 0.35 |
| 47 | SULT2B1 | rs8109050  | 0.65  | 0.33  | 0.99 |
| 48 | UGT1A   | rs10176426 | 0.54  | 0.046 | 0.94 |
| 48 | UGT1A   | rs10179091 | 0.89  | 0.36  | 0.93 |
| 48 | UGT1A   | rs10199882 | 0.41  | 0.21  | 0.07 |
| 48 | UGT1A   | rs11563251 | 1.00  | 0.40  | 0.22 |
| 48 | UGT1A   | rs1377460  | 0.04  | 0.008 | 0.40 |
| 48 | UGT1A   | rs1823803  | 0.33  | 0.60  | 0.65 |
| 48 | UGT1A   | rs1875263  | 0.29  | 0.046 | 0.53 |
| 48 | UGT1A   | rs2013030  | 0.21  | 0.43  | 0.31 |
| 48 | UGT1A   | rs2302538  | 0.80  | 0.55  | 0.28 |
| 48 | UGT1A   | rs2741027  | 0.42  | 0.54  | 0.09 |
| 48 | UGT1A   | rs3771342  | 0.26  | 0.08  | 0.07 |
| 48 | UGT1A   | rs4114768  | 0.58  | 0.89  | 0.55 |

|    |        |            |        |       |       |
|----|--------|------------|--------|-------|-------|
| 48 | UGT1A  | rs4148328  | 0.87   | 0.26  | 0.18  |
| 48 | UGT1A  | rs4402757  | 0.04   | 0.03  | 0.02  |
| 48 | UGT1A  | rs4663945  | 0.22   | 0.63  | 0.13  |
| 48 | UGT1A  | rs4663972  | 0.24   | 0.009 | 0.27  |
| 48 | UGT1A  | rs6719561  | 0.92   | 0.41  | 0.14  |
| 48 | UGT1A  | rs6744284  | 0.80   | 0.42  | 0.50  |
| 48 | UGT1A  | rs6755571  | 0.02   | 0.02  | 0.01  |
| 48 | UGT1A  | rs7585521  | 0.006  | 0.01  | 0.007 |
| 48 | UGT1A  | rs7592624  | 0.25   | 0.30  | 0.03  |
| 48 | UGT1A  | rs7608713  | 0.06   | 0.17  | 0.04  |
| 49 | UGT2B4 | rs1389930  | 0.84   | 0.71  | 0.23  |
| 49 | UGT2B4 | rs17671289 | 0.15   | 0.14  | 0.16  |
| 49 | UGT2B4 | rs1826690  | 0.18   | 0.24  | 0.26  |
| 49 | UGT2B4 | rs1845557  | 0.16   | 0.23  | 0.14  |
| 49 | UGT2B4 | rs2642872  | 0.45   | 0.97  | 0.12  |
| 49 | UGT2B4 | rs3822179  | 0.72   | 0.82  | 0.94  |
| 49 | UGT2B4 | rs4554145  | 0.58   | 0.81  | 0.33  |
| 49 | UGT2B4 | rs7657880  | 0.96   | 0.66  | 0.97  |
| 50 | UGT2B7 | rs10028494 | 0.30   | 0.89  | 0.98  |
| 50 | UGT2B7 | rs12506592 | 0.51   | 0.86  | 0.29  |
| 50 | UGT2B7 | rs12642938 | 0.0046 | 0.25  | 0.04  |
| 50 | UGT2B7 | rs3924194  | 0.43   | 0.19  | 0.08  |
| 50 | UGT2B7 | rs4356975  | 0.008  | 0.18  | 0.003 |
| 50 | UGT2B7 | rs4694169  | 0.06   | 0.23  | 0.07  |
| 50 | UGT2B7 | rs7435335  | 0.47   | 0.82  | 0.30  |

Univariate correlations analyses between SNPs (coded 1, 2, 3 in alphabetical order for A, C, G and T with 2 for the heterozygote) and age and BMI-adjusted serum sex steroid levels in the comprehensive screening in the GOOD study were performed using Pearson's correlation. Association between 604 genetic markers in 50 sex steroid-related genes (1-50) and serum estradiol (E2), estrone (E1) and testosterone (T) were evaluated in young adult men (GOOD, n = 1041).
